# Supplementary material
Source: Springer Nature journal article supplement (https://www.springermedizin.de/resource/supplementary/12967_2012_1363_MOESM1_ESM.pdf/9573458)

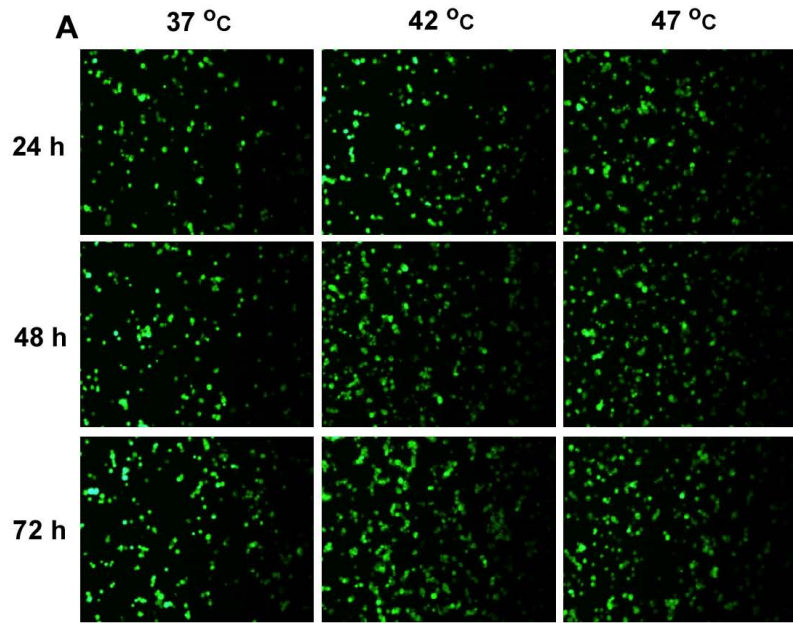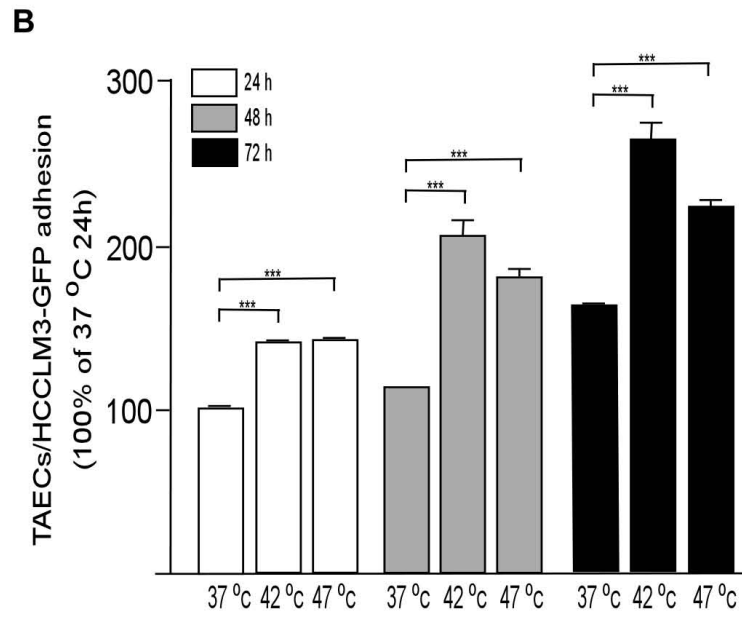

Supplement: MOESM1 [file 9573458]
